# Supplementary material for: Possible Role of Envelope Components in the Extreme Copper Resistance of the Biomining Acidithiobacillus ferrooxidans
Source: MDPI journal article supplement (doi:10.3390/genes9070347), 2018-07-10

## Supplementary Information

### **Possible Role of envelope components in the extreme copper resistance of the biomining *Acidithiobacillus ferrooxidans***

Nia Oetiker<sup>1</sup>, Rodrigo Norambuena<sup>1</sup>, Cristóbal Martínez-Bussenius<sup>1</sup>, Claudio A. Navarro<sup>1</sup>, Fernando Amaya<sup>2</sup>, Sergio A. Álvarez<sup>2</sup>, Alberto Paradela<sup>3</sup> and Carlos A. Jerez<sup>1\*</sup>

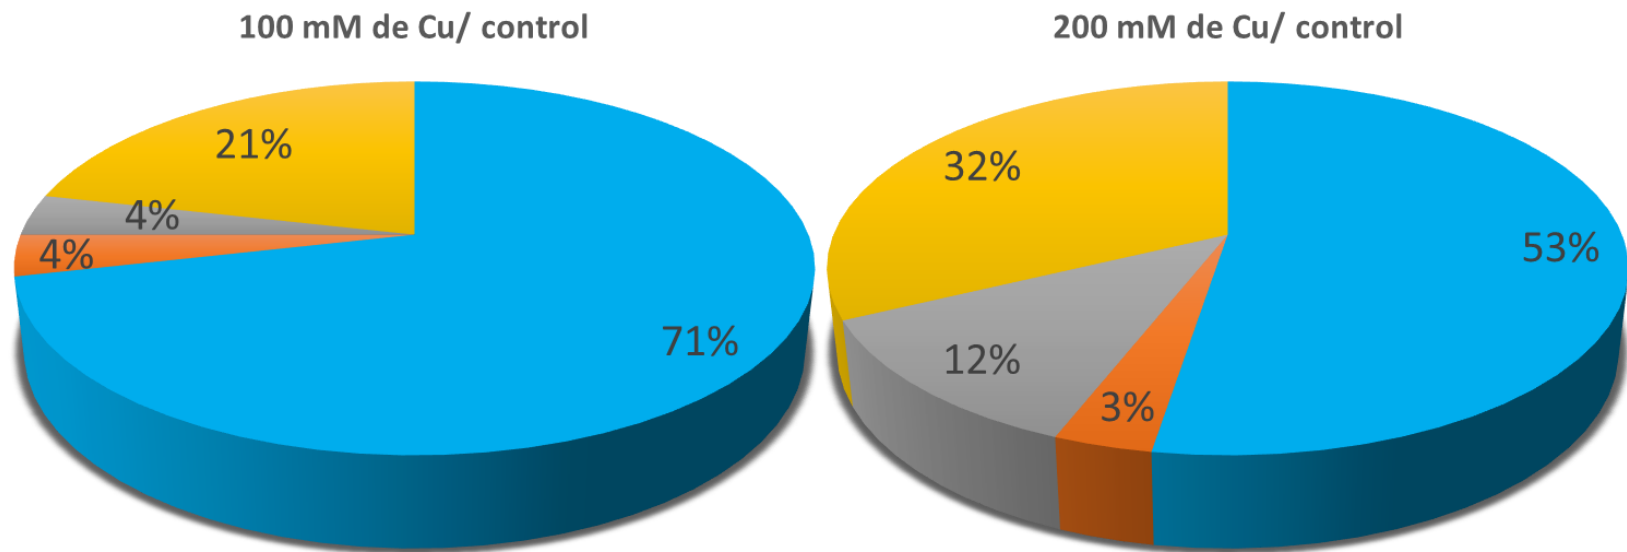

Figure S1. Functional categories of *A. ferrooxidans* proteins changing their synthesis levels in cells grown in the presence of 100 and 200 mM  $\text{CuSO}_4$ . Blue: Metabolism; Orange: Cellular Processes and Signaling; Gray: Information Storage and Processing; Yellow: Poorly Characterized

Table S1. Functional categories and numbers of *A. ferrooxidans* ATCC 53993 proteins changing their synthesis levels in cells grown in the presence of 100 and 200 mM CuSO<sub>4</sub>.

| Functional category                                               | Number of proteins changed |             |                       |             |
|-------------------------------------------------------------------|----------------------------|-------------|-----------------------|-------------|
|                                                                   | 100 mM de Cu/ Control      |             | 200 mM de Cu /Control |             |
|                                                                   | Protein (-)                | Protein (+) | Protein (-)           | Protein (+) |
| <b>METABOLISM</b>                                                 |                            |             |                       |             |
| Inorganic Ion Transport and Metabolism                            | 3                          | 9           | 5                     | 10          |
| Carbohydrate Metabolism and Transport                             | 5                          | 0           | 5                     | 1           |
| Energy Production and Conversion                                  | 1                          | 0           | 4                     | 4           |
| Secondary Metabolites biosynthesis, Transport, and Catabolism     | 1                          | 0           | 2                     | 0           |
| Lipid transport and metabolism                                    | 1                          | 0           | 0                     | 0           |
| <b>INFORMATION STORAGE AND PROCESSING</b>                         |                            |             |                       |             |
| Translation, Ribosomal structure and Biogenesis                   | 0                          | 1           | 7                     | 0           |
| <b>CELLULAR PROCESSES AND SIGNALING</b>                           |                            |             |                       |             |
| Post-translational Modification, Protein turnover, and Chaperones | 1                          | 0           | 1                     | 0           |
| Cell wall/Membrane/Envelope biogenesis                            | 0                          | 0           | 1                     | 0           |
| <b>POORLY CHARACTERIZED</b>                                       |                            |             |                       |             |
| General function prediction only                                  | 0                          | 0           | 1                     | 0           |
| Function Unknown                                                  | 5                          | 1           | 16                    | 2           |
| Total                                                             | 17                         | 11          | 42                    | 17          |

(+) increased level. (–) decreased level.

Table S2. Proteins with increased levels in *A. ferrooxidans* ATCC 53993 grown in the presence of 100 and 200 mM CuSO<sub>4</sub>

| Accession number                              | ORF               | Function/similarity                                         | qvalue (FDR) | Coverture (%) | Peptides number | Log2 Fold change (Cu 100/0 mM) | Log2 Fold change (Cu 200/0 mM) |
|-----------------------------------------------|-------------------|-------------------------------------------------------------|--------------|---------------|-----------------|--------------------------------|--------------------------------|
| <b>METABOLISM</b>                             |                   |                                                             |              |               |                 |                                |                                |
| <b>Inorganic ion transport and metabolism</b> |                   |                                                             |              |               |                 |                                |                                |
| B5EJG7                                        | <i>Lferr_1619</i> | Outer membrane efflux protein (CusC1)                       | 0.001        | 45            | 9               | 1.018                          | 1.258                          |
| B5EJG6                                        | <i>Lferr_1618</i> | Efflux transporter, RND family, MFP subunit (CusB1)         | 0.001        | 63.3          | 15              | 0.927                          | 0.859                          |
| B5EM36                                        | <i>Lferr_2057</i> | Periplasmatic Copper chaperone (CusF2)                      | 0.001        | 60            | 3               | 1.084                          | 1.92                           |
| B5EK73                                        | <i>Lferr_0174</i> | Periplasmatic Copper chaperonea (CusF3)                     | 0.001        | 60            | 3               | 0.68                           | 1.63                           |
| B5EK71                                        | <i>Lferr_0172</i> | Heavy metal efflux pump, CzcA family (CusA3)                | 0.001        | 39.09         | 10              | 1.06                           | 1.019                          |
| B5EM41                                        | <i>Lferr_2062</i> | Outer membrane efflux protein (CusC2)                       | 0            | 44.5          | 12              | 0.823                          | 1.084                          |
| B5EJG5                                        | <i>Lferr_1617</i> | Heavy metal efflux pump, CzcA family (CusA1)                | 0.002        | 35            | 9               | 1.022                          | 0.855                          |
| B5EM40                                        | <i>Lferr_2061</i> | Efflux transporter, RND family, MFP subunit (CusB2)         | 0.003        | 68.3          | 6               | 0.801                          | 0.968                          |
| B5EM39                                        | <i>Lferr_2060</i> | Heavy metal efflux pump, CzcA family (CusA2)                | 0.003        | 38.3          | 9               | 0.927                          | 0.846                          |
| B5EQ72                                        | <i>Lferr_1075</i> | Periplasmic glucan biosynthesis protein (MdoG)              | 0.009        | 48.1          | 15              | 0                              | 0.415                          |
| <b>Carbohydrate metabolism and transport</b>  |                   |                                                             |              |               |                 |                                |                                |
| B5EL00                                        | <i>Lferr_1865</i> | Carboxymethylenebutenolidase                                | 0.011        | 88.43         | 16              | 0                              | 0.347                          |
| <b>Energy production and conversion</b>       |                   |                                                             |              |               |                 |                                |                                |
| B5EJH8                                        | <i>Lferr_1630</i> | Cytochrome c class I                                        | 0.026        | 9.64          | 1               | 0                              | 1.843                          |
| B5EQK0                                        | <i>Lferr_2705</i> | Cytochrome c class I (CycA1)                                | 0.013        | 27.31         | 5               | 0                              | 0.515                          |
| B5EMP7                                        | <i>Lferr_2183</i> | FAD-dependent pyridine nucleotide-disulphide oxidoreductase | 0.007        | 65.53         | 20              | 0                              | 0.369                          |
| B5ES29                                        | <i>Lferr_1469</i> | FAD-dependent pyridine nucleotide-disulphide oxidoreductase | 0.015        | 74.65         | 21              | 0                              | 0.341                          |

| INFORMATION STORAGE AND PROCESSING              |                   |                            |       |       |   |       |       |
|-------------------------------------------------|-------------------|----------------------------|-------|-------|---|-------|-------|
| Translation, ribosomal structure and biogenesis |                   |                            |       |       |   |       |       |
| B5ENR6                                          | <i>Lferr_2358</i> | Uncharacterized protein    | 0.014 | 17.02 | 1 | 1.593 | 0     |
| POORLY CHARACTERIZED                            |                   |                            |       |       |   |       |       |
| Function unknown                                |                   |                            |       |       |   |       |       |
| B5ELE6                                          | <i>Lferr_0408</i> | O-antigen polymerase (Wzy) | 0.026 | 3.19  | 1 | 0     | 1.795 |
| B5EM38                                          | <i>Lferr_2059</i> | Uncharacterized protein    | 0.005 | 38.86 | 5 | 0     | 0.936 |
| B5ELK0                                          | <i>Lferr_1967</i> | Uncharacterized protein    | 0.025 | 4.17  | 1 | 1.081 | 0     |

Color represents change in log<sub>2</sub> fold change value: green, increase; yellow, no change; red, decrease.

Table S3. Proteins with lower levels of synthesis in *A. ferrooxidans* ATCC 53993 grown in the presence of 100 and 200 mM CuSO<sub>4</sub>.

| Accession number                              | ORF               | Function/similarity                                          | qvalue (FDR) | Coverture (%) | Peptides number | Log2 Fold change (Cu 100/0 mM) | Log2 Fold change (Cu 200/0 mM) |
|-----------------------------------------------|-------------------|--------------------------------------------------------------|--------------|---------------|-----------------|--------------------------------|--------------------------------|
| <b>METABOLISM</b>                             |                   |                                                              |              |               |                 |                                |                                |
| <b>Inorganic ion transport and metabolism</b> |                   |                                                              |              |               |                 |                                |                                |
| B5EJZ3                                        | <i>Lferr_1702</i> | TonB-dependent receptor                                      | 0.039        | 43.46         | 18              | 0                              | -0.318                         |
| B5EQV4                                        | <i>Lferr_1216</i> | Extracellular solute-binding protein family                  | 0.049        | 69.38         | 15              | -0.463                         | -0.343                         |
| B5ERT7                                        | <i>Lferr_1375</i> | von Willebrand factor type A                                 | 0.003        | 64.11         | 35              | 0                              | -0.37                          |
| B5EPV1                                        | <i>Lferr_2552</i> | TonB-dependent receptor                                      | 0.011        | 26.94         | 16              | 0                              | -0.407                         |
| B5EJF9                                        | <i>Lferr_1611</i> | Phosphate-binding protein PstS                               | 0.001        | 58.29         | 13              | -0.934                         | -0.488                         |
| B5EK98                                        | <i>Lferr_0199</i> | Periplasmatic Copper chaperone (CusF4)                       | 0.007        | 51.61         | 6               | -0.673                         | 0                              |
| <b>Carbohydrate metabolism and transport</b>  |                   |                                                              |              |               |                 |                                |                                |
| B5ERT6                                        | <i>Lferr_1374</i> | Ketose-bisphosphate aldolase class-II                        | 0.007        | 76.84         | 22              | 0                              | -0.374                         |
| B5ERV1                                        | <i>Lferr_1389</i> | Ribulose-bisphosphate carboxylase                            | 0            | 72.94         | 31              | -0.501                         | -0.574                         |
| B5ERV0                                        | <i>Lferr_1388</i> | Ribulose-bisphosphate carboxylase                            | 0.001        | 90            | 9               | -0.501                         | -0.53                          |
| B5ERS6                                        | <i>Lferr_1364</i> | Transketolase central region                                 | 0.001        | 65.36         | 31              | -0.699                         | -1.163                         |
| B5ERU9                                        | <i>Lferr_1387</i> | Carboxysome structural protein CsoS2                         | 0.002        | 68.67         | 47              | -0.289                         | -1.185                         |
| B5EL78                                        | <i>Lferr_0340</i> | Toluene tolerance family protein                             | 0.024        | 67.45         | 9               | -0.439                         | 0                              |
| <b>Energy production and conversion</b>       |                   |                                                              |              |               |                 |                                |                                |
| B5EQK2                                        | <i>Lferr_2707</i> | Ubiquinol-cytochrome c reductase iron-sulfur subunit (petA1) | 0.003        | 45.63         | 9               | 0                              | -0.478                         |
| B5ERS3                                        | <i>Lferr_1361</i> | FAD linked oxidase domain protein                            | 0.028        | 23.51         | 4               | 0                              | -0.588                         |

|                                                                          |                   |                                                        |       |       |    |        |        |
|--------------------------------------------------------------------------|-------------------|--------------------------------------------------------|-------|-------|----|--------|--------|
| B5ERS1                                                                   | <i>Lferr_1359</i> | NADH/Ubiquinone/plastoquinone (Complex I)              | 0.003 | 17.58 | 7  | 0      | -0.956 |
| B5ERS4                                                                   | <i>Lferr_1362</i> | D-lactate dehydrogenase (Cytochrome)                   | 0.01  | 8.2   | 2  | 0      | -1.157 |
| B5EQY4                                                                   | <i>Lferr_2743</i> | Rusticyanin                                            | 0.002 | 74.87 | 14 | -1.139 | 0      |
| <b>Secondary metabolites biosynthesis, transport, and catabolism</b>     |                   |                                                        |       |       |    |        |        |
| B5ERU3                                                                   | <i>Lferr_1381</i> | Microcompartments protein                              | 0.004 | 95.54 | 4  | 0      | -0.69  |
| B5ERU5                                                                   | <i>Lferr_1383</i> | Microcompartments protein                              | 0.022 | 94.9  | 1  | 0      | -0.851 |
| B5EKF9                                                                   | <i>Lferr_1773</i> | Hopanoid biosynthesis associated membrane protein HpnM | 0.007 | 55.71 | 11 | -0.485 | 0      |
| <b>Lipid transport and metabolism</b>                                    |                   |                                                        |       |       |    |        |        |
| B5EKF4                                                                   | <i>Lferr_1768</i> | Uncharacterized protein                                | 0.011 | 37.16 | 5  | -0.633 | 0      |
| <b>INFORMATION STORAGE AND PROCESSING</b>                                |                   |                                                        |       |       |    |        |        |
| <b>Translation, ribosomal structure and biogenesis</b>                   |                   |                                                        |       |       |    |        |        |
| B5EMD3                                                                   | <i>Lferr_0558</i> | 30S ribosomal protein S15                              | 0.004 | 48.31 | 2  | 0      | -0.784 |
| B5ELY3                                                                   | <i>Lferr_0501</i> | 30S ribosomal protein S19                              | 0.001 | 70.33 | 7  | 0      | -0.867 |
| B5EKY1                                                                   | <i>Lferr_1846</i> | 30S ribosomal protein S20                              | 0.003 | 25.27 | 3  | 0      | -0.932 |
| B5ELZ0                                                                   | <i>Lferr_0508</i> | 50S ribosomal protein L24                              | 0.005 | 19.81 | 3  | 0      | -0.982 |
| B5ELZ7                                                                   | <i>Lferr_0515</i> | 50S ribosomal protein L30                              | 0.002 | 45    | 3  | 0      | -1.056 |
| B5ENA6                                                                   | <i>Lferr_2294</i> | 50S ribosomal protein L33                              | 0.002 | 47.06 | 2  | 0      | -1.513 |
| B5ELU3                                                                   | <i>Lferr_0461</i> | 50S ribosomal protein L27                              | 0.044 | 58.14 | 5  | 0      | -0.416 |
| <b>CELLULAR PROCESSES AND SIGNALING</b>                                  |                   |                                                        |       |       |    |        |        |
| <b>Post-translational modification, protein turnover, and chaperones</b> |                   |                                                        |       |       |    |        |        |
| B5EN20                                                                   | <i>Lferr_0699</i> | 10 kDa chaperonin groS                                 | 0.007 | 90.63 | 11 | -0.445 | -0.404 |
| <b>Cell wall/membrane/envelope biogenesis</b>                            |                   |                                                        |       |       |    |        |        |
| B5EL33                                                                   | <i>Lferr_1898</i> | Carbohydrate-selective porin (OprB)                    | 0.005 | 36.46 | 10 | 0      | -0.635 |
| <b>POORLY CHARACTERIZED</b>                                              |                   |                                                        |       |       |    |        |        |

| General function prediction only |                   |                                      |       |       |    |        |        |
|----------------------------------|-------------------|--------------------------------------|-------|-------|----|--------|--------|
| B5ERT8                           | <i>Lferr_1376</i> | CbbQ/NirQ/NorQ domain protein        | 0.018 | 83.15 | 13 | 0      | -0.348 |
| Function unknown                 |                   |                                      |       |       |    |        |        |
| B5ERD1                           | <i>Lferr_1295</i> | Uncharacterized protein              | 0.016 | 51.28 | 7  | 0      | -0.458 |
| B5ERS9                           | <i>Lferr_1367</i> | Uncharacterized protein              | 0.012 | 28.08 | 8  | 0      | -0.519 |
| B5EMQ4                           | <i>Lferr_2190</i> | Uncharacterized protein              | 0.007 | 56.44 | 6  | 0      | -0.531 |
| B5EP93                           | <i>Lferr_2439</i> | Uncharacterized protein              | 0.003 | 51.37 | 6  | 0      | -0.569 |
| B5EJI6                           | <i>Lferr_0030</i> | Pyrrolo-quinoline quinone            | 0.003 | 43.29 | 11 | -0.468 | -0.62  |
| B5ERS0                           | <i>Lferr_1358</i> | UPF0753 protein                      | 0     | 70.18 | 51 | -0.401 | -0.64  |
| B5EQX9                           | <i>Lferr_2738</i> | Uncharacterized protein              | 0.003 | 63.43 | 9  | 0      | -0.649 |
| B5ERS5                           | <i>Lferr_1363</i> | Uncharacterized protein              | 0.003 | 64.94 | 17 | 0      | -0.733 |
| B5ERU8                           | <i>Lferr_1386</i> | Carboxysome shell carbonic anhydrase | 0.001 | 52.72 | 21 | 0      | -0.772 |
| B5EL34                           | <i>Lferr_1899</i> | Pyrrolo-quinoline quinone            | 0.001 | 47.59 | 15 | -0.373 | -0.778 |
| B5EM86                           | <i>Lferr_2116</i> | Uncharacterized protein              | 0.003 | 28    | 4  | 0      | -0.909 |
| B5EJU1                           | <i>Lferr_1650</i> | Uncharacterized protein              | 0.003 | 27.2  | 4  | 0      | -0.975 |
| B5EJ87                           | <i>Lferr_1539</i> | Uncharacterized protein              | 0.011 | 12.7  | 1  | -2.336 | -1.109 |
| B5ELR1                           | <i>Lferr_0429</i> | Uncharacterized protein              | 0.03  | 36.89 | 9  | 0      | -1.124 |
| B5ERT9                           | <i>Lferr_1377</i> | Uncharacterized protein              | 0.016 | 10.71 | 1  | 0      | -1.149 |
| B5EJC5                           | <i>Lferr_1577</i> | Ribonuclease BN                      | 0.046 | 2.71  | 1  | 0      | -1.11  |
| B5EN88                           | <i>Lferr_2275</i> | Uncharacterized protein              | 0.008 | 54.17 | 4  | -0.818 | 0      |

Color represents the change in log<sub>2</sub> fold value: green, increased level; yellow, no change; red, decreased level.

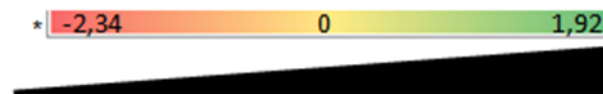

Supplement: s1 [file s1]
